# Supplementary material for: Two enhancer binding proteins activate σ54-dependent transcription of a quorum regulatory RNA in a bacterial symbiont
Source: eLife. 2023 May 5;12:e78544. doi: 10.7554/eLife.78544 (PMC10162802; doi:10.7554/eLife.78544)
Supplement: Figure 2—source data 1. [file elife-78544-fig2-data1.xlsx]

## Sheet: Figure 2B
Replicate	WT erm	DbinK erm	DbinK binK erm	NF control
A	101.142	164.019	98.5146	77.0503
B	104.945	172.338	102.777	80.547
C	103.02	165.746	101.189	80.8844

## Sheet: Figure 2D
OD600
Time	WT A	WT B	WT C	DbinK A	DbinK B	DbinK C	rscS* A	rscS* B	rscS* C	DbinK rscS* A	DbinK rscS* B	DbinK rscS* C
1.25	0.07	0.07	0.07	0.09	0.08	0.1	0.08	0.09	0.08	0.05	0.08	0.09
2.25	0.11	0.1	0.13	0.12	0.11	0.12	0.12	0.12	0.15	0.11	0.09	0.12
3.25	0.3	0.22	0.23	0.26	0.28	0.34	0.32	0.41	0.41	0.35	0.36	0.39
4.25	0.58	0.57	0.57	0.59	0.54	0.71	0.65	0.7	0.73	0.69	0.66	0.66
5.25	1.12	1.04	1.26	1.13	1.11	1.41	1.07	1.13	1.13	1.05	1.06	1.12
6.25	2.5	2	2.6	2.6	2.55	2.7	1.8	1.89	1.94	1.77	1.81	1.83
7.25	3.9	3.75	4.2	4.1	4	4.65	3.4	3.65	3.7	2.75	2.8	2.7
8.25	5.45	5.05	5.7	5.1	5	5.7	5.1	4.7	4.8	4.3	7.2	6.2
Lum
Time	WT A	WT B	WT C	DbinK A	DbinK B	DbinK C	rscS* A	rscS* B	rscS* C	DbinK rscS* A	DbinK rscS* B	DbinK rscS* C
1.25	154	142	176	267	276	268	154	150	154	148	147	161
2.25	124	133	169	145	151	187	101	106	110	98	98	95
3.25	529	220	451	344	340	758	96	108	135	110	109	95
4.25	10495	8013	17958	14379	10268	32051	543	1213	1569	223	206	238
5.25	40630	35128	56037	42428	35653	67883	3891	6147	7021	1456	1682	1623
6.25	48179	47527	61658	49262	43607	58842	14326	14673	13619	4575	4141	4196
7.25	55233	53752	69891	51526	47675	51905	21257	17627	17435	3831	3513	3319
8.25	61126	68997	125230	64540	71248	102331	30163	65967	63799	9165	10809	8695
Specific Lum
Time	WT A	WT B	WT C	DbinK A	DbinK B	DbinK C	rscS* A	rscS* B	rscS* C	DbinK rscS* A	DbinK rscS* B	DbinK rscS* C
1.25	2200	2028.57	2514.29	2966.67	3450	2680	1925	1666.67	1925	2960	1837.5	1788.89
2.25	1127.27	1330	1300	1208.33	1372.73	1558.33	841.667	883.333	733.333	890.909	1088.89	791.667
3.25	1763.33	1000	1960.87	1323.08	1214.29	2229.41	300	263.415	329.268	314.286	302.778	243.59
4.25	18094.8	14057.9	31505.3	24371.2	19014.8	45142.3	835.385	1732.86	2149.32	323.188	312.121	360.606
5.25	36276.8	33776.9	44473.8	37546.9	32119.8	48144	3636.45	5439.82	6213.27	1386.67	1586.79	1449.11
6.25	19271.6	23763.5	23714.6	18946.9	17100.8	21793.3	7958.89	7763.49	7020.1	2584.75	2287.85	2292.9
7.25	14162.3	14333.9	16640.7	12567.3	11918.8	11162.4	6252.06	4829.32	4712.16	1393.09	1254.64	1229.26
8.25	11215.8	13662.8	21970.2	12654.9	14249.6	17952.8	5914.31	14035.5	13291.5	2131.4	1501.25	1402.42
