# Supplementary material for: Two enhancer binding proteins activate σ54-dependent transcription of a quorum regulatory RNA in a bacterial symbiont
Source: eLife. 2023 May 5;12:e78544. doi: 10.7554/eLife.78544 (PMC10162802; doi:10.7554/eLife.78544)
Supplement: Figure 3—source data 1. [file elife-78544-fig3-data1.xlsx]

## Sheet: Figure 3B-C
CFP = WT, YFP = Dqrr1							CFP = WT, YFP = WT							Key
L3	L2	L1	R1	R2	R3		L3	L2	L1	R1	R2	R3		Code	Scores
0	0	1	1	1	0		0	0	2	2	1	1		0	CFP- YFP-
1	0	2	1	0	0		0	0	2	1	2	0		1	CFP+ YFP-
1	0	1	1	1	0		1	2	2	2	3	2		2	CFP- YFP+
0	2	1	1	0	0		0	1	2	1	0	0		3	CFP+ YFP+
0	1	1	1	1	0		1	0	3	3	0	0
0	2	1	1	0	1		1	1	1	1	1	0
0	2	1	2	1	0		0	0	2	1	0	0
0	1	1	1	1	1		0	0	1	3	0	0
0	0	1	1	1	0		0	1	2	3	2	0
0	2	2	1	0	0		0	0	1	2	0	2
1	0	1	1	0	1		0	0	2	2	0	0
0	0	1	1	0	0		0	2	3	3	0	0
0	1	3	3	0	0		0	0	3	3	0	0
2	0	1	1	0	0		0	0	2	1	1	0
0	1	1	1	1	2		0	2	1	0	3	0
1	1	1	1	1	1		0	1	2	1	0	0
0	2	1	1	1	0		0	1	2	2	2	0
0	1	1	1	0	1		0	0	2	1	0	0
0	0	1	1	0	0		0	0	1	1	0	2
0	1	0	1	1	0		0	2	2	1	0	0
2	2	1	1	2	1		0	0	1	2	0	0
0	1	3	1	1	0		0	2	2	3	2	0
1	0	3	1	1	2		0	2	2	2	3	0
0	0	3	1	1	0		0	0	3	2	0	0
1	0	1	1	0	1		0	1	1	1	1	0
0	0	1	1	0	2		0	2	3	2	0	0
0	1	1	1	1	0		0	0	2	1	3	0
0	2	1	1	0	0		0	0	1	1	1	1

## Sheet: Figure 3D
CFP = WT, YFP = DbinK							Key
L3	L2	L1	R1	R2	R3		Code	Scores
0	1	2	2	0	0		0	CFP- YFP-
0	0	2	2	1	0		1	CFP+ YFP-
0	2	2	3	2	0		2	CFP- YFP+
0	0	2	2	2	0		3	CFP+ YFP+
2	0	2	2	1	2
2	2	2	3	2	2
0	0	2	3	0	3
0	2	2	3	0	2
0	2	1	2	1	3
0	2	2	2	2	0
0	1	2	2	2	0
0	2	2	0	2	0
0	2	2	3	0	0
0	0	1	1	0	2
2	3	1	1	1	0
0	2	3	2	2	2
0	2	3	2	3	0
1	0	3	3	0	2
2	0	2	2	0	0
0	2	2	3	2	2
0	2	1	2	2	0
0	0	2	2	0	0
0	0	2	3	2	0
0	2	1	2	2	0
0	2	2	2	2	2
0	0	3	3	2	0
2	1	2	0	2	0

## Sheet: Figure 3E
CFP = WT, YFP = DbinK Dqrr1							Key
L3	L2	L1	R1	R2	R3		Code	Scores
0	2	1	2	1	0		0	CFP- YFP-
1	0	1	2	0	1		1	CFP+ YFP-
2	0	2	1	0	2		2	CFP- YFP+
0	1	1	1	1	1		3	CFP+ YFP+
0	0	1	3	0	0
1	1	2	2	1	0
0	0	1	1	0	1
0	0	1	1	0	0
0	2	2	2	1	0
1	1	1	1	1	0
1	0	1	1	0	1
0	0	2	2	0	1
0	0	2	2	0	0
0	0	1	2	0	0
0	1	1	1	0	0
0	0	1	1	0	0
0	0	1	1	0	0
0	0	1	1	0	0
1	0	1	1	0	0
0	2	3	2	2	0
0	2	1	2	0	0
0	0	1	2	0	0
0	0	1	3	0	1
2	2	1	1	1	0
0	0	1	3	0	0
0	1	1	2	1	0

## Sheet: Figure 3F
WT	ΔbinK	Δqrr1	ΔbinK Δqrr1
308.999	22995.6	584.891	28679
267.615	21903.1	300.722	20813.3
206.919	16658.4	270.374	17521.9
165.535	4422.55	165.535	14238.8
137.946	4210.11	160.017	7211.82
110.357		118.634	4698.44
110.357		99.3212	4110.79
85.5266		82.7676	551.784
66.2141		71.7319	389.008
27.5892			99.3212
			60.6963
