# Supplementary material for: Two enhancer binding proteins activate σ54-dependent transcription of a quorum regulatory RNA in a bacterial symbiont
Source: eLife. 2023 May 5;12:e78544. doi: 10.7554/eLife.78544 (PMC10162802; doi:10.7554/eLife.78544)
Supplement: Figure 4—source data 1. [file elife-78544-fig4-data1.xlsx]

## Sheet: Figure 4B
Replicate	WT	rpoN	binK	binK rpoN	NF control
A	73.3753	79.3061	124.507	77.8012	42.7132
B	78.5872	82.8365	159.644	82.9445	53.0379
C	73.6162	73.6162	141.847	80.1127	40.0438

## Sheet: Figure 4C
Replicate	WT	binK	binK luxO	luxO	NF
A	94.8549	169.932	132.77	82.6601	65.4216
B	96.0101	167.64	136.03	85.0626	66.0428
C	99.5702	177.11	140.272	87.5988	65.7511

## Sheet: Figure 4D
Replicate	binK	binK luxO	binK sypG	binK luxO sypG	NF
A	177.3	155.784	171.046	97.1809	74.177
B	156.684	134.238	166.69	90.7941	76.1985
C	168.414	147.393	170.438	95.261	73.336

## Sheet: Figure 4E
Replicate	WT	ΔbinK	sypG (D53E)	ΔbinK sypG (D53E)
A	72.9653	160.226	174.374	206.462
B	72.8381	160.653	173.27	201.415
C	72.1375	160.135	174.959	206.656

## Sheet: Figure 4F
Replicate	WT	luxO sypG	luxO sypG Ptrc::sypG	NF
A	97.419	90.4708	144.78	73.3721
B	100.005	92.2781	149.481	72.2529
C	97.9623	87.2849	143.33	74.4732
