# Supplementary material for: Two enhancer binding proteins activate σ54-dependent transcription of a quorum regulatory RNA in a bacterial symbiont
Source: eLife. 2023 May 5;12:e78544. doi: 10.7554/eLife.78544 (PMC10162802; doi:10.7554/eLife.78544)
Supplement: Figure 5—source data 1. [file elife-78544-fig5-data1.xlsx]

## Sheet: Figure 5C
Replicate	NF WT -C8	WT -C8	ainS luxIR -C8	NF WT +C8	WT +C8	ainS luxIR +C8
A	43.7951	61.1207	162.832	36.0867	56.8441	62.8428
B	43.9385	63.9907	168.827	34.0044	55.7525	61.2399
C	42.8205	63.5062	163.587	37.7581	54.9398	61.2851
