# Supplementary material for: Two enhancer binding proteins activate σ54-dependent transcription of a quorum regulatory RNA in a bacterial symbiont
Source: eLife. 2023 May 5;12:e78544. doi: 10.7554/eLife.78544 (PMC10162802; doi:10.7554/eLife.78544)
Supplement: Figure 6—source data 1. [file elife-78544-fig6-data1.xlsx]

## Sheet: Figure 6B
Replicate	control (-373)	(-357)	(-262)	(-209)	(-175)	(-106)	(-60)	NF
A	149.862	143.655	145.72	145.621	143.501	70.1779	59.5841	52.0918
B	157.328	149.101	151.24	143.849	147.56	70.1871	60.7081	50.2702
C	156.87	150.589	155.067	150.225	151.675	73.8607	61.1085	53.0083

## Sheet: Figure 6C
Replicate	WT	WT	G-131T	C-130A	A-129C
A	76.051	250.927	242.255	144.873	163.814
B	79.2949	250.995	241.659	144.962	167.799
C	76.1689	250.639	242.649	150.715	170.394

## Sheet: Figure 6D
Replicate	WT/DluxO DsypG	WT/DluxO DsypG Ptrc::sypG	G-131T	C-130A	A-129C	NF
A	71.1244	139.009	96.4843	79.051	78.2498	50.0473
B	70.7876	137.591	97.0561	78.9961	79.1596	48.9767
C	74.1867	142.121	103.849	83.4411	80.4454	53.1365

## Sheet: Figure 6E
L3	L2	L1	R1	R2	R3		CFP = WT
2	2	2	1	2	0		YFP = WT
2	1	0	0	1	0
0	3	3	3	1	3		Key
1	2	3	2	2	0		Code	Scores
1	0	1	1	2	0		0	CFP- YFP-
2	1	3	3	3	1		1	CFP+ YFP-
1	1	0	0	2	3		2	CFP- YFP+
0	3	2	3	1	2		3	CFP+ YFP+
0	1	0	0	3	0
1	0	1	1	3	3
1	1	0	0	0	0
2	1	2	3	2	1
2	1	1	1	2	0
1	1	2	1	2	2
2	2	1	1	2	1
1	1	0	1	1	0
0	0	1	2	2	0
2	1	1	1	2	0
0	1	2	1	2	0
0	3	3	1	1	0
2	2	1	3	1	0
2	2	3	2	1	1
2	1	2	3	1	3
2	2	3	2	1	2
3	0	3	3	3	3
1	1	2	1	2	2
1	3	0	3	3	2
0	0	3	2	0	3

## Sheet: Figure 6F
L3	L2	L1	R1	R2	R3		CFP = WT
1	0	1	1	1	0		YFP = Δqrr1
1	1	1	2	2	1
1	1	0	3	3	0		Key
0	0	2	1	0	0		Code	Scores
3	2	2	3	2	0		0	CFP- YFP-
1	1	0	0	1	0		1	CFP+ YFP-
0	1	3	1	1	0		2	CFP- YFP+
2	2	1	1	2	1		3	CFP+ YFP+
1	1	0	0	3	1
0	3	3	1	3	3
1	1	2	2	0	0
1	1	2	2	1	1
0	0	1	1	0	0
1	1	2	1	1	1
1	1	3	2	1	1
0	1	1	2	2	0
1	1	1	2	1	1
0	1	1	1	1	0
2	1	2	1	2	0
2	1	1	1	0	0
0	0	3	2	0	0
1	2	3	1	2	1
0	2	3	3	2	3
1	3	0	1	1	1
0	2	1	2	1	1
0	0	2	1	0	0
0	0	1	3	0	0
0	0	2	3	0	0
0	0	1	1	1	0

## Sheet: Figure 6G
L3	L2	L1	R1	R2	R3		CFP = WT
2	1	0	1	3	2		YFP = Pqrr1::qrr1
1	3	1	0	0	2
1	2	2	3	1	1		Key
2	1	3	1	0	1		Code	Scores
1	2	1	3	3	0		0	CFP- YFP-
1	2	3	1	2	1		1	CFP+ YFP-
1	3	3	2	1	1		2	CFP- YFP+
0	0	1	2	0	0		3	CFP+ YFP+
1	1	2	3	1	0
0	1	1	1	1	2
0	2	3	0	2	0
3	2	2	1	3	1
1	2	2	2	2	2
2	3	1	3	1	0
2	1	2	0	2	1
1	3	1	1	1	0
1	2	1	2	2	1
1	2	1	2	0	0
2	1	2	2	2	2
0	2	2	0	0	0
1	0	1	2	1	2
2	1	2	1	1	1
0	0	1	1	1	0
0	1	0	1	2	3
0	2	1	1	2	0
2	3	0	1	2	1
1	0	1	2	2	0

## Sheet: Figure 6H
L3	L2	L1	R1	R2	R3		CFP = WT
1	0	1	3	0	0		YFP = Pqrr1(G-131T)::qrr1
1	3	1	0	0	0
1	1	2	2	3	1		Key
0	0	1	1	0	0		Code	Scores
0	1	3	0	2	0		0	CFP- YFP-
0	0	1	1	3	0		1	CFP+ YFP-
2	1	1	3	3	1		2	CFP- YFP+
3	1	2	1	3	0		3	CFP+ YFP+
0	1	3	3	1	2
1	1	1	2	1	1
1	2	0	0	3	2
1	3	0	2	1	1
2	1	0	0	1	2
2	1	1	1	1	0
1	3	1	1	2	1
2	2	1	1	2	1
0	1	1	1	1	0
0	0	1	1	0	0
0	0	0	0	2	1
3	2	0	0	2	0
0	1	3	3	2	1
0	0	3	3	2	0
1	1	2	1	2	1
2	0	3	1	1	0
0	3	1	1	1	0
0	2	0	1	1	1
