# Supplementary material for: Two enhancer binding proteins activate σ54-dependent transcription of a quorum regulatory RNA in a bacterial symbiont
Source: eLife. 2023 May 5;12:e78544. doi: 10.7554/eLife.78544 (PMC10162802; doi:10.7554/eLife.78544)
Supplement: Figure 8—source data 1. [file elife-78544-fig8-data1.xlsx]

## Sheet: Figure 8
Replicate	control	Ptrc::sypGAS	NF
A	114.035	124.508	77.219
B	112.763	133.335	87.6971
C	116.969	134.541	86.3723
